1 **Brief Communication:**

2

3

4 **Lymphatic metastases have more diverse roots than distant metastases**

5

6

7 Johannes G. Reiter<sup>1,\*</sup>, Shriya Nagpal<sup>1,2</sup>, Kamila Naxerova<sup>3,\*</sup>

8

9 <sup>1</sup>Canary Center for Cancer Early Detection, Department of Radiology, Stanford University

10 School of Medicine, Palo Alto, CA 94304, USA

11 <sup>2</sup>Center for Applied Mathematics, Cornell University, Ithaca, NY 14853, USA

12 <sup>3</sup>Center for Systems Biology, Massachusetts General Hospital and Harvard Medical  
13 School, Boston, MA 02114, USA

14

15

16

17 \*Correspondence to:

18 [johannes.reiter@stanford.edu](mailto:johannes.reiter@stanford.edu)

19 [naxerova.kamila@mgh.harvard.edu](mailto:naxerova.kamila@mgh.harvard.edu)

20

21

22

23

24 **Abstract**

25 Both lymphatic and distant metastases arise through cancer cell migration and  
26 colonization of ectopic sites. Nonetheless, the two metastasis types are associated with  
27 significantly different clinical outcomes, suggesting that distinct biological mechanisms  
28 may drive their formation. Here we show fundamental differences in the seeding patterns  
29 of lymphatic and distant metastases. Analyzing the reconstructed phylogenies of human  
30 colorectal cancers, we find that distant metastases typically are monophyletic, originating  
31 from one common ancestor. Lymphatic metastases, in contrast, are almost exclusively  
32 polyphyletic and can be seeded from many primary tumor regions. We develop a rigorous  
33 mathematical framework for quantifying the phylogenetic diversity of metastases while  
34 accounting for differential lesion sampling among patients. Our results indicate that a  
35 smaller fraction of primary tumor cells gives rise to distant metastases than lymphatic  
36 metastases. Thus, the two metastasis types exhibit profoundly distinct phylogenetic traits,  
37 indicating that different evolutionary mechanisms may drive their formation and influence  
38 their clinical behavior.

39 **Main text**

40 In most cancers, metastasis to distant organs confers a considerably worse prognosis  
41 than spread to locoregional lymph nodes. For example, 5-year survival for colorectal  
42 cancers that have metastasized to local lymph nodes or the pericolonic fat (stage III) is  
43 53-90% but drops to 12% for patients with spread to distant organs (stage IV)<sup>1</sup>. The  
44 survival difference for patients with locoregional and distant disease is similar for other  
45 tumor types, such as breast cancer and melanoma<sup>2,3</sup>.

46  
47 The formation of both lymphatic and distant metastases depends on cancer cell migration  
48 and colonization of foreign microenvironments<sup>4</sup>. Given that both types of metastasis  
49 require similar cellular abilities<sup>5</sup> and indicate the presence of a potentially lethal cell type  
50 capable of ectopic growth, it is worth asking why clinical outcomes of stage IV patients  
51 differ so markedly from those of stage III patients.

52  
53 The simplest explanation is that distant metastases often affect vital organs such as the  
54 liver and the lungs and therefore lead to accelerated death. However, locoregional  
55 recurrence may be equally dangerous in some cancer types. For example, autopsy  
56 studies have shown that local recurrence was the cause of death in approximately 50%  
57 of colorectal cancer patients<sup>6</sup>, highlighting the importance of locoregional disease control.  
58 Similarly, in pancreatic cancer, local recurrence has been estimated to be responsible for  
59 approximately 30% of deaths<sup>7</sup>.

60

61 Are lymphatic metastases perhaps easier to remove than distant metastases? 5-year  
62 survival for colorectal cancer patients with resectable liver metastases is 25-44%<sup>8</sup>, well  
63 above average for stage IV disease, suggesting that surgical management of metastases  
64 can make a difference. Yet, clinically, resection of affected lymph nodes is not a high  
65 priority in colorectal cancer. Nodes are primarily resected for staging and not for  
66 therapeutic purposes<sup>9</sup>. Pre-operative imaging of mesenteric lymph nodes is challenging<sup>10</sup>  
67 and lymph node harvest practices vary by institution<sup>11</sup>. Therefore, affected nodes  
68 probably stay behind in a fraction of patients. In rectal cancer, clinical trials have shown  
69 that extended lateral pelvic lymph node dissection did not improve survival<sup>12,13</sup>, echoing  
70 similar findings in breast cancer<sup>14</sup> and melanoma<sup>15</sup>. Collectively, these data suggest that  
71 “left-behind” positive nodes do not necessarily lead to local recurrence and call into  
72 question the idea that relative ease of surgical management is the reason for the survival  
73 difference between patients with lymphatic and distant metastases.

74  
75 Finally, distant and lymphatic metastases may represent fundamentally different disease  
76 forms that are driven by distinct biology and dissemination mechanisms. To date, no  
77 systematic comparative studies have investigated the evolutionary features of lymphatic  
78 and distant metastases in humans. Here, we show that lymph node metastases in  
79 colorectal cancer are a phylogenetically more diverse group than distant metastases.  
80 Genetic heterogeneity among lymph node metastases mirrors the genetic diversity of the  
81 primary tumor. Phylogenetic analyses show that lymphatic metastases intermingle with  
82 primary tumor regions on the evolutionary tree, indicating that in stage III patients, many  
83 if not all primary tumor regions are capable of seeding lymph node metastases. In stark

84 contrast, distant metastases are a homogeneous, monophyletic group that tends to be  
85 the terminal branch of the phylogenetic tree. Their distinctive phylogenetic features  
86 indicate that lymphatic and distant metastases arise from cancer cells with different  
87 biological properties.

88  
89 To investigate the evolution of lymphatic and distant metastases, we took advantage of a  
90 recently published collection of colorectal cancer phylogenies<sup>16</sup>. From this study, we  
91 selected all patients (n=18) with multiple primary tumor regions (range 2-10) and/or lymph  
92 node and/or distant metastases (range 2-10). These data formed the basis of our analysis  
93 (see Supplementary Table 1 for detailed patient information). Importantly, this cohort was  
94 exhaustively sampled, and a majority of resected metastases of sufficient size and purity  
95 were included, minimizing sampling bias<sup>16</sup>. Phylogenies were reconstructed based on  
96 small insertions and deletions in hypermutable polyguanine tracts, a method that  
97 produces rich mutation data and robust trees<sup>17</sup>. We had previously used this patient  
98 cohort to ascertain that most liver metastases originate in the primary tumor and do not  
99 share a common subclonal origin with lymph node metastases<sup>16</sup>. Here, we analyzed the  
100 evolutionary trees from a fundamentally different perspective, asking whether lymphatic  
101 and distant metastases *as a group* consistently display distinct phylogenetic features.

102  
103 Evaluating patient trees (**Fig. 1a** and Supplementary Figures 1-3), we noticed a recurring  
104 pattern. Lymph node metastases and primary tumor samples typically diverged, often in  
105 alternating succession, from the tree trunk, while distant lesions usually had one common  
106 ancestor and tended to form the terminal branch of the tree (Supplementary Fig. 4). Given

107 the consistency of this observation, we sought to formalize it. First, to avoid sampling  
108 bias, we reduced the data set to one sample per lymphatic and distant metastasis. That  
109 is, in cases where multiple biopsies were taken from the same metastasis, we randomly  
110 removed all but one sample, such that each metastasis was represented by only one  
111 biopsy in the final data set (see Supplementary Figs. 1-3 for all phylogenies). Then, we  
112 determined the fraction of patients in whom all anatomically distinct distant metastases  
113 had one common ancestor and grouped together in a monophyletic clade that did not  
114 include any primary tumors or lymphatic metastases. We found that in 67% of patients,  
115 distant metastases were part of such a clade. In contrast, lymphatic metastases formed  
116 a monophyletic group in only 10% of patients (**Fig. 1b**,  $p = 0.036$ , two-tailed Fisher's exact  
117 test). A slightly altered classification approach in which we considered distant and  
118 lymphatic metastases a monophyletic group if the clade contained all metastases but no  
119 primary tumor samples (allowing for the other metastasis type to be part of the branch)  
120 gave similar results, with 20% and 83% of patients having one common ancestor for all  
121 lymphatic and distant metastases, respectively ( $p = 0.035$ , two-tailed Fisher's exact test,  
122 Supplementary Fig. 5). Note that the classification into monophyletic and polyphyletic  
123 groups is unrelated to our previously described common and distinct origin categories,  
124 which reflect whether lymphatic and distant metastases have a common subclonal  
125 origin<sup>16</sup>. For example, all phylogenetic trees in Fig. 1a show polyphyletic lymph node  
126 metastases and monophyletic distant metastases, although C45 and C66 belong to the  
127 distinct origins category, while C36 shows common origin of lymphatic and distant  
128 metastases<sup>16</sup>.

129 We further explored the high phylogenetic homogeneity of distant metastases (**Fig. 1b**)  
130 by calculating, for every patient, the mean phylogenetic distance (number of internal  
131 nodes) separating different primary tumor regions and distinct lymphatic and distant  
132 metastases. The distances were not significantly different for primary tumor regions and  
133 lymphatic metastases (mean distances of 0.50 vs 0.42) but significantly lower for distant  
134 metastases (mean distance of 0.24,  $p=8.4e-3$  and  $p=0.045$ , two-tailed Mann-Whitney  
135 tests), confirming the relative homogeneity of this group (**Fig. 1c**).

136  
137 We wondered whether differential sampling of lymph node and distant metastases may  
138 have affected the results. For example, if ten lymphatic but only two distant metastases  
139 are included in a phylogeny, it is far more likely that all distant metastases will have one  
140 common ancestor by chance. We did not observe a significant difference between the  
141 number of lymphatic and distant metastases in our data set, but the mean and variance  
142 were slightly higher in the lymph node metastasis group (mean 3.7 vs 3.0 metastases,  
143  $p=0.54$ , Student's t-test, **Fig. 1d**). Additionally, the number of primary tumor regions  
144 sampled in each case further affects the odds of finding monophyletic metastasis groups  
145 by chance alone. To account for the different number of lesions sampled in each patient,  
146 we developed a mathematical framework that allowed us to quantify the likelihood of  
147 common origin for any given phylogeny. We define  $m$  as the number of metastasis  
148 samples under investigation (either lymphatic or distant), and  $k$  as the number of all other  
149 tumor samples in the phylogeny (**Supplementary Methods**). We calculate a *root diversity*  
150 *score* (RDS) defined by the probability that at least  $l$  out of  $m$  metastases form a common  
151 clade in a tree with  $n = k + m$  samples (Supplementary Table 2). In other words, the root

152 diversity score denotes the probability that a tree with an equally or more extreme  
153 clustering of metastases occurs by chance alone. For example, in subject C36 (**Fig. 1a**),  
154 the root diversity score for distant metastasis is 0.067, as the likelihood that two distant  
155 metastases ( $m=2$ ) will cluster by chance in a phylogeny with  $n=9$  samples is 6.7%. The  
156 power to detect non-random clustering of metastases increases with the number of  
157 samples  $n$  in a phylogeny (**Fig. 2a**).

158  
159 We used the root diversity score to quantify the homogeneity of distant metastases in our  
160 cohort. We found that after accounting for the number of other samples ( $k$ ) in the  
161 phylogenies, indeed the root diversity score was generally very low (**Fig. 2b**), even for  
162 phylogenies where distant metastases did not form a monophyletic clade. To validate the  
163 low root diversity of distant metastases in an independent cohort, we searched the  
164 literature for colorectal cancer phylogenies with at least two primary tumor samples and  
165 multiple anatomically distinct distant lesions. We found one appropriate study comprising  
166 five patients with a total of 17 liver metastases<sup>18</sup>. We calculated the root diversity scores  
167 for distant metastases for all five patients (trees are shown in Supplementary Fig. 6) and  
168 found the smallest possible root diversity score in every case (**Fig. 2b**), independently  
169 confirming our observation that distant metastases tend to be monophyletic. In 8 out of  
170 11 patients with multiple distant lesions in the combined two cohorts, the likelihood that  
171 metastases would cluster to the observed degree by chance alone was below 10%  
172 (Supplementary Table 2). Furthermore, combining all root diversity scores, we calculated  
173 a combined p-value of  $4.5e10^{-7}$  for the entire patient population. This p-value corresponds  
174 to the likelihood that distant metastases would cluster to the observed degree by chance.



175 Thus, we find strong evidence for distant metastasis homogeneity both within individual  
176 phylogenies and across the whole patient cohort.

177  
178 Returning to our original question, we next applied the root diversity score to lymphatic  
179 and distant metastases in a comparative analysis. The results showed highly significant  
180 differences in root diversity between the two metastasis types (mean diversity score of  
181 0.69 vs 0.090;  $p=2.6e10^{-3}$ , two-tailed Mann-Whitney test), confirming that lymphatic  
182 metastases are far more likely to be polyphyletic than distant metastases (**Fig. 2c**), even  
183 after accounting for differential sampling in a mathematically rigorous fashion.

184  
185 We wondered whether these differences might be due to treatment effects. Treatment did  
186 not affect the majority of patients in the combined two cohorts, as 16 out of 23 cases  
187 (70%) had synchronous metastasis. In these cases, all primary and metastatic lesions  
188 were resected at the same time. Seven patients had metachronous metastasis and  
189 received treatment in the time interval between the resection of the primary tumor and  
190 associated lymphatic metastases and the resection of distant metastases. Two of these  
191 did not have multiple distant metastases (C65, C39) and therefore were not included in  
192 **Fig. 2c**. Only five patients with multiple distant metastases had metachronous metastasis  
193 and treatment in the interval between resections (C66, C36, C69, CRC2 and CRC5). In  
194 one case (C69), some distant metastases (Liv1, Liv2) were resected along with the  
195 primary tumor and the lymph nodes, and others (Liv3) 6 months later, after a  
196 chemotherapy regimen. All distant metastases still clustered together in this case  
197 (Supplementary Fig. 2), arguing against an effect of the treatment on the inferred

198 phylogeny. Nonetheless, we recalculated the root diversity score after excluding *all*  
199 treated patients (C66, C36, C69, CRC2 and CRC5) from the analysis and found that the  
200 results remained highly significant ( $7.0e10^{-3}$ , Supplementary Fig. 7).

201  
202 In summary, our results indicate that in colorectal cancer, lymphatic and distant  
203 metastases are phylogenetically distinct groups. Lymph node metastases are  
204 polyphyletic, mirror the heterogeneity of the primary tumor and are furthermore polyclonal,  
205 according to a recent report<sup>19</sup>. These observations suggest the absence of strong  
206 selection during the formation of lymph node metastases: many cells from the primary  
207 tumor appear capable of migrating to and thriving in lymph nodes. Distant metastases, in  
208 contrast, typically have one common ancestor and form a monophyletic group (**Fig. 2d**).

209  
210 Multiple explanations for the high phylogenetic similarity of distant metastases exist. First,  
211 metastases may have given rise to each other<sup>20-22</sup>. Most lesions in our data set were liver  
212 metastases and could have formed through intra-hepatic seeding. Standing on its own,  
213 we consider this explanation relatively unlikely, as many phylogenetically similar  
214 metastases (e.g. C69, C36, CRC3, CRC4) presented in different liver segments, which  
215 are independent functional units with separate vascular systems. Furthermore, the two  
216 patients in our cohort who had metastases in different organs (C45 and C38) still showed  
217 monophyletic origin of these lesions.

218  
219 Second, it is possible that distant metastasis represents a specific selective bottleneck  
220 and thereby, in contrast to lymphatic metastasis, selects for a particular subpopulation.

221 The ability to enter and exit the blood stream<sup>23</sup>, travel longer distances<sup>24</sup>, or survive in  
222 organ-specific microenvironments<sup>25</sup> may represent such a bottleneck. This possibility is  
223 further supported by a recent study which showed that distant metastases in different  
224 cancer types were more often monophyletic than expected by chance<sup>26</sup>. The existence of  
225 an (epi-) genetically defined metastatic clone has been strongly debated over the years<sup>27</sup>.  
226 Our results motivate a continued search for the molecular traits of this clone. It will  
227 furthermore be important to determine whether metastasis to different organs selects for  
228 different lineages<sup>25</sup>, a question that cannot be conclusively answered with our liver-centric  
229 data set.

230  
231 Most importantly, our data show that lymphatic metastases evolve by fundamentally  
232 different rules than distant metastases in colorectal cancer. Lymphatic metastases'  
233 phylogenetic features reflect the relative absence of strong selective pressures, and no  
234 specialized clone appears to be necessary for their formation, potentially explaining their  
235 more benign clinical implications.

236  
237

## 238 **Methods**

239  
240 **Root diversity score.** The root diversity score (RDS) denotes the probability that in a  
241 cancer phylogeny with  $n$  tumor samples at least  $l$  out of  $m$  metastases samples form a  
242 single clade. We generalized Edwards' and Cavalli-Sforza's approach to calculate the  
243 number of distinct phylogenies with a given number of samples in which at least  $l$  of  $m$

244 metastases samples form a monophyletic group<sup>28,29</sup> (**Supplementary Methods**). To  
245 obtain the probability that such a phylogeny would evolve by chance, we divide this  
246 number of phylogenies by the total number of phylogenies with n tumor samples (see  
247 Equation S2 in **Supplementary Methods**). All RDS values are provided in  
248 Supplementary Table 2.

249  
250 **Code availability.** The source code to calculate the root diversity score as well as to  
251 produce various figure panels is available as jupyter notebook at  
252 <http://www.github.com/johannesreiter/rootdiversity>. (The code will be released upon  
253 publication; for review please see supplementary files). The notebooks are implemented  
254 in Python 3.6. All required input data is contained in Supplementary Tables 1 and 2.

255  
256 **Data availability.** Results are based on previously published data and inferred cancer  
257 phylogenies. Original raw polyguanine profiling data, and phylogenetic trees can be  
258 downloaded from datadryad.org (<http://dx.doi.org/10.5061/dryad.vv53d>). Original whole-  
259 exome sequencing data of Kim et al.<sup>18</sup> was deposited to the Sequence Read Archive  
260 (SRA) at the NCBI under the project ID of PRJNA271316. All figures have associated raw  
261 data.

262  
263 **Acknowledgments.** We would like to thank Christina Curtis and Martin Nowak for helpful  
264 discussions. This work was support by grants from the NIH (R37CA225655) and AACR  
265 (561314) to K.N. and from NCI (K99CA229991) to J.G.R.

266

267 **Author contributions.** K.N. and J.G.R. designed the study. All authors performed the  
268 research and wrote the manuscript.  
269  
270 **Competing interests.** The authors declare no competing financial interests.

## References

1. Survival Rates for Colorectal Cancer, by Stage. *American Cancer Society* Available at: <https://www.cancer.org/cancer/colon-rectal-cancer/detection-diagnosis-staging/survival-rates.html#references>. (Accessed: 11th December 2018)
2. Survival Rates for Melanoma Skin Cancer, by Stage. *American Cancer Society* Available at: <https://www.cancer.org/cancer/melanoma-skin-cancer/detection-diagnosis-staging/survival-rates-for-melanoma-skin-cancer-by-stage.html>. (Accessed: 11th December 2018)
3. Breast Cancer Survival Rates & Statistics. *American Cancer Society* Available at: <https://www.cancer.org/cancer/breast-cancer/understanding-a-breast-cancer-diagnosis/breast-cancer-survival-rates.html>. (Accessed: 11th December 2018)
4. Massagué, J. & Obenauf, A. C. Metastatic colonization by circulating tumour cells. *Nature* **529**, 298–306 (2016).
5. Wong, S. Y. & Hynes, R. O. Lymphatic or Hematogenous Dissemination: How Does a Metastatic Tumor Cell Decide? *Cell Cycle* **5**, 812–817 (2006).
6. Welch, J. P. & Donaldson, G. A. The clinical correlation of an autopsy study of recurrent colorectal cancer. *Ann. Surg.* **189**, 496–502 (1979).
7. Iacobuzio-Donahue, C. A. *et al.* DPC4 gene status of the primary carcinoma correlates with patterns of failure in patients with pancreatic cancer. *J. Clin. Oncol.* **27**, 1806–13 (2009).
8. Garden, O. J. *et al.* Guidelines for resection of colorectal cancer liver metastases. *Gut* **55 Suppl 3**, iii1-8 (2006).
9. Chen, S. L. & Bilchik, A. J. Resecting Lymph Nodes in Colon Cancer: More than a Staging Operation? *Ann. Surg. Oncol.* **14**, 2175–2176 (2007).
10. O'Dwyer, S. T., Haboubi, N. Y., Johnson, J. S. & Gardy, R. Detection of lymph node metastases in colorectal carcinoma. *Colorectal Dis.* **3**, 288–94 (2001).
11. McDonald, J. R., Renehan, A. G., O'Dwyer, S. T. & Haboubi, N. Y. Lymph node harvest in colon and rectal cancer: current considerations. *World J Gastrointest Surg* 2012; 4: 9-19.
12. Georgiou, P. *et al.* Extended lymphadenectomy versus conventional surgery for rectal cancer: a meta-analysis. *Lancet. Oncol.* **10**, 1053–62 (2009).

13. Georgiou, P. A., Mohammed Ali, S., Brown, G., Rasheed, S. & Tekkis, P. P. Extended lymphadenectomy for locally advanced and recurrent rectal cancer. *Int. J. Colorectal Dis.* **32**, 333–340 (2017).
14. Giuliano, A. E. *et al.* Axillary Dissection vs No Axillary Dissection in Women With Invasive Breast Cancer and Sentinel Node Metastasis. *JAMA* **305**, 569 (2011).
15. Faries, M. B. *et al.* Completion Dissection or Observation for Sentinel-Node Metastasis in Melanoma. *N. Engl. J. Med.* **376**, 2211–2222 (2017).
16. Naxerova, K. *et al.* Origins of lymphatic and distant metastases in human colorectal cancer. *Science* **357**, 55–60 (2017).
17. Naxerova, K. *et al.* Hypermutable DNA chronicles the evolution of human colon cancer. *Proc. Natl. Acad. Sci. U. S. A.* **111**, E1889–98 (2014).
18. Kim, T.-M. *et al.* Subclonal Genomic Architectures of Primary and Metastatic Colorectal Cancer Based on Intratumoral Genetic Heterogeneity. *Clin. Cancer Res.* **21**, 4461–72 (2015).
19. Ulintz, P. J., Greenson, J. K., Wu, R., Fearon, E. R. & Hardiman, K. M. Biology of Human Tumors Lymph Node Metastases in Colon Cancer Are Polyclonal. *Clin Cancer Res* **24**, (2017).
20. Gundem, G. *et al.* The evolutionary history of lethal metastatic prostate cancer. *Nature* **520**, 353–357 (2015).
21. McPherson, A. *et al.* Divergent modes of clonal spread and intraperitoneal mixing in high-grade serous ovarian cancer. *Nat. Genet.* **48**, 758–767 (2016).
22. El-Kebir, M., Satas, G. & Raphael, B. J. Inferring parsimonious migration histories for metastatic cancers. *Nat. Genet.* **50**, 718–726 (2018).
23. Valastyan, S. & Weinberg, R. A. Tumor metastasis: molecular insights and evolving paradigms. *Cell* **147**, 275–92 (2011).
24. Ryser, M. D., Min, B.-H., Siegmund, K. D. & Shibata, D. Spatial mutation patterns as markers of early colorectal tumor cell mobility. *Proc. Natl. Acad. Sci. U. S. A.* **115**, 5774–5779 (2018).
25. Obenauf, A. C. & Massagué, J. Surviving at a distance: organ specific metastasis. *Trends in cancer* **1**, 76–91 (2015).
26. Zhao, Z.-M. *et al.* Early and multiple origins of metastatic lineages within primary tumors. *Proc. Natl. Acad. Sci. U. S. A.* **113**, 2140–5 (2016).
27. Vanharanta, S. & Massagué, J. Origins of Metastatic Traits. *Cancer Cell* **24**, 410–421 (2013).
28. Edwards, A. W. F., Cavalli-Sforza, L. . The reconstruction of evolution. *Heredity (Edinb)*. **18**, 104–105 (1963).
29. Felsenstein, J. Inferring phylogenies. *Sinauer Assoc.* (2003). doi:10.1086/383584

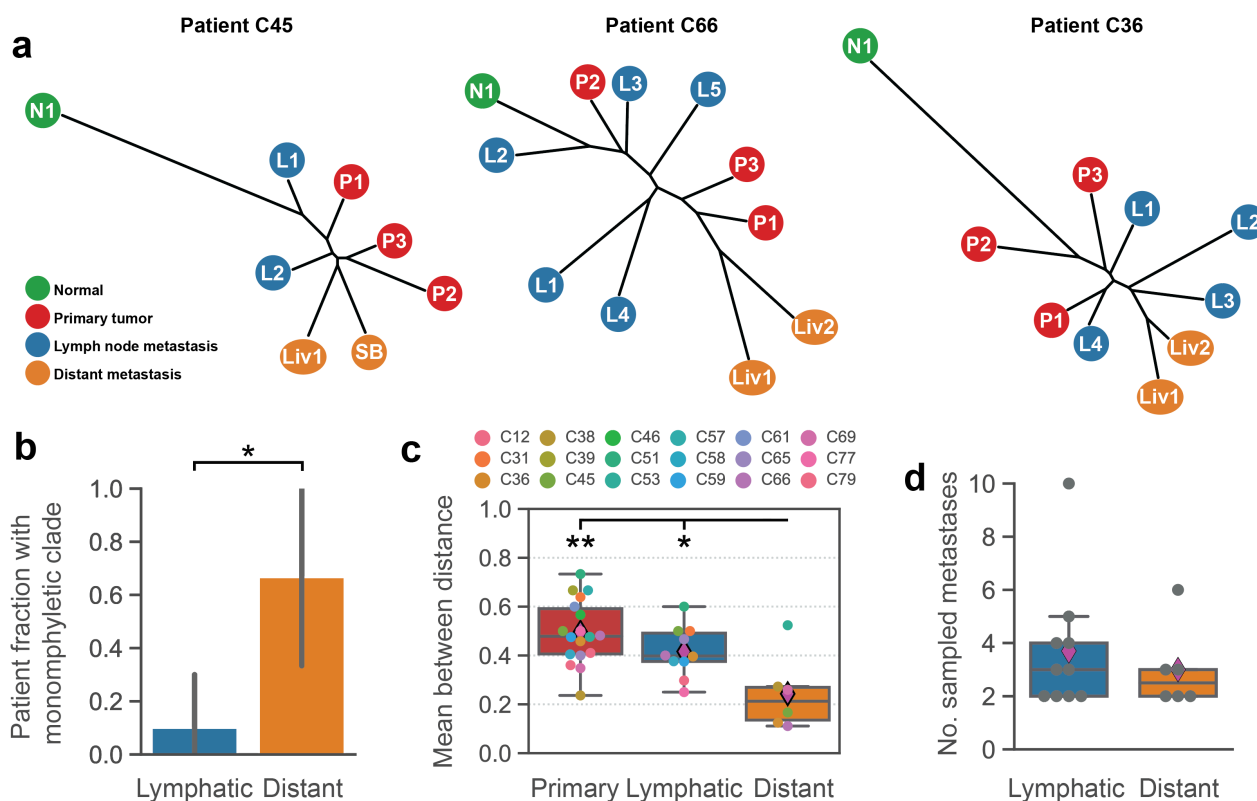

**Fig. 1: Distant but not lymphatic metastases form monophyletic clades in most**

**patients.** **a** | Phylogenetic trees of colorectal cancer patients C45, C66, C36, adapted from Naxerova et al.<sup>16</sup>. Distant metastases arise from a common ancestor in all cases.

Liv, liver metastasis; SB, small bowel metastasis. **b** | All distant metastases formed a monophyletic clade in 67% (4/6) of patients. All lymphatic metastases formed a monophyletic group in 10% (1/10) of patients ( $p = 0.036$ , two-tailed Fisher's exact test).

The black bars denote 90% confidence intervals. **c** | The normalized mean number of internal phylogenetic nodes that separated a pair of distinct distant metastases was significantly lower than the mean for primary tumor samples (0.24 vs 0.5) or lymphatic metastases (0.24 vs 0.42), respectively. No statistically significant difference was observed between the mean distances of primary tumor samples and lymphatic metastases ( $p=0.11$ , two-tailed Mann-Whitney test). Center line, median; box limits, upper

and lower quartiles; points, outliers. Magenta diamonds illustrate the mean in each group.

**d** | No statistically significant difference was observed between the number of lymphatic and distant metastases samples (mean of 3.7 vs 3;  $p=0.54$ , two-tailed t-test).

\*  $P < 0.05$ ; \*\*  $P < 0.01$ .



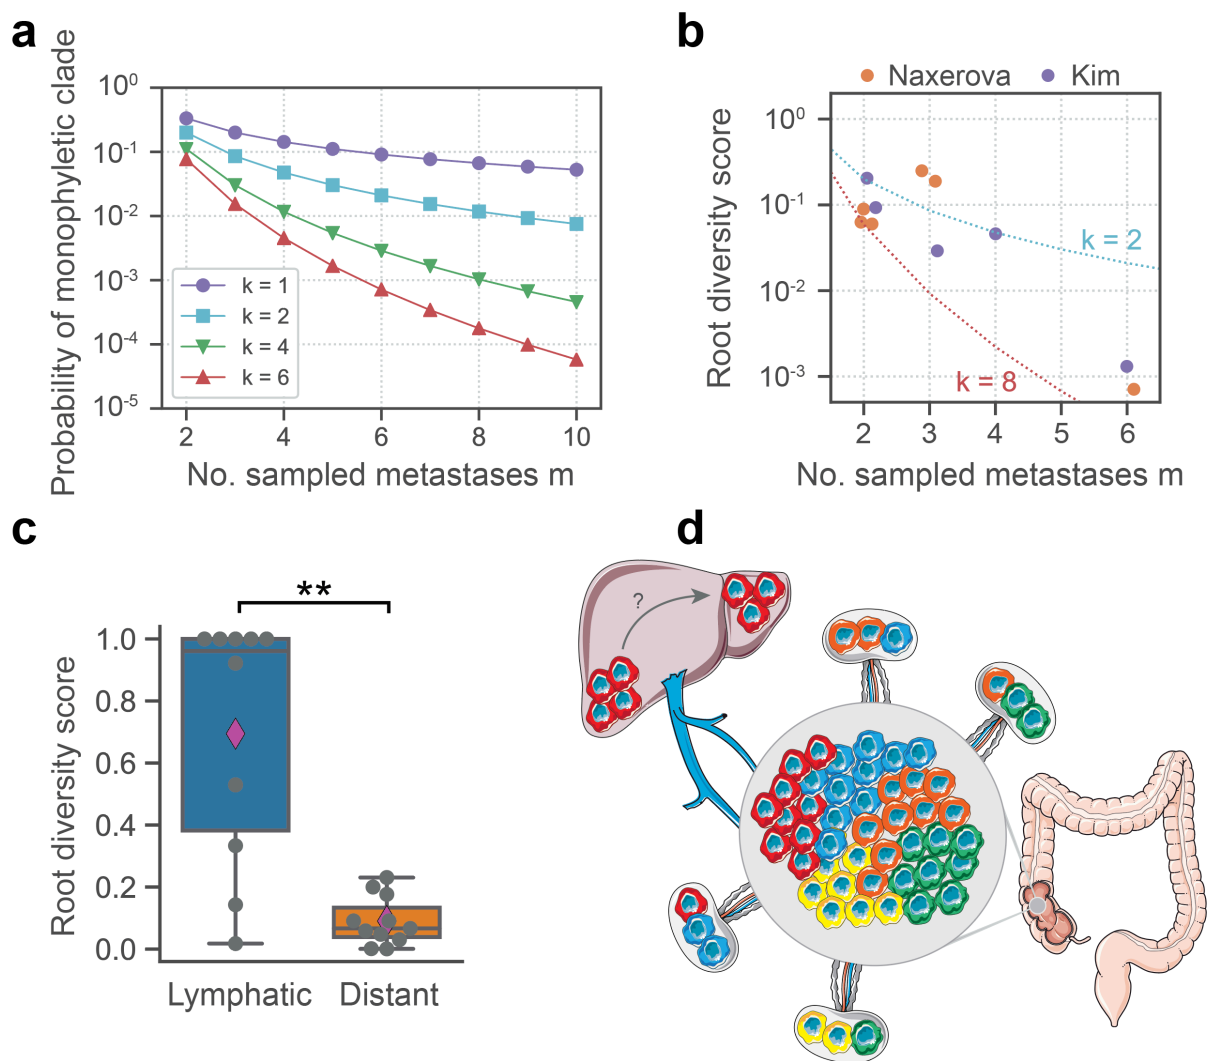

**Fig. 2. Distant but not lymphatic metastases exhibit a very low root diversity score.**

**a** | The probability of observing a monophyletic clade of all sampled metastases  $m$  by chance decreases with increasing  $m$  and increasing number of other cancer samples  $k$ .

**b** | In both cohorts, the root diversity score decreases as the power to observe a low score increases with the number of sampled distant metastases.  $k$  ranges between 2 and 8 in both cohorts.

**c** | The root diversity score was significantly lower for distant metastases than lymphatic metastases (0.09 vs 0.65;  $p=0.0026$ ; two-tailed Mann-Whitney test).

Center line, median; box limits, upper and lower quartiles; points, outliers. Magenta

diamonds illustrate the mean in each group. **d** | Summary schematic showing that lymphatic metastases can be seeded from many primary tumor regions and mirror the heterogeneity of the primary tumor, while distant metastases are typically formed by one clone, either due to selection or intra-organ metastasis.
